# Supplementary material for: Novel Peptide-Mediated Interactions Derived from High-Resolution 3-Dimensional Structures
Source: PLoS Comput Biol. 2010 May 20;6(5):e1000789. doi: 10.1371/journal.pcbi.1000789 (PMC2873903; doi:10.1371/journal.pcbi.1000789)
Supplement: Table S1 — All DMI candidates derived from high-resolution 3D structures, specifying the binding domain, topology or interaction type ID, the consensus motif, enrichment and p-value in the interactome cross-validation, if applicable, and the ELM pattern and name, if available. For each interaction type, up to 3 top-ranked motifs are provided. (0.05 MB XLS) [file pcbi.1000789.s003.xls]

## Sheet: Sheet1
Domain	Topological Cluster	Pattern	Enrichment	p-value	ELM pattern and ligand name, if available
14-3-3	0	[HR]S.P	1.31	0	R[SFYW].S.P (LIG_14-3-3_1), R.[SYFWTQAD].[ST].[PLM] (LIG_14-3-3_2), [RHK][STALV].[ST].[PESRDIF] (LIG_14-3-3_3)
14-3-3	0	R..S.P	2	0
14-3-3	0	R.{0,2}S.P	1.51	0
14-3-3	2	LDL	1.19	0.007
14-3-3	2	LD.{0,1}L	1.22	0
A2M_comp	1	R..Q..V.L..F
A2M_comp	1	R..Q.A..L..F
A2M_comp	1	K.Q..V.L..F
Apocytochr_F_C	0	Y..P..I..T..C
Apocytochr_F_C	0	FP..I..T..C
Apocytochr_F_C	0	P..I..TF.C
Arm	0	KK[KR]K	1.45	0.043
Arm	0	KK[KR][KR]	1.28	0.106
Arm	0	K[KR].[KR]	0.94	0.835
Arm	1	KKRKV	2.13	0.383
Arm	1	KKRK	2.25	0.001
Arm	1	K[KR].[KR]	1.17	0.009
Arm	2	KK[KR]K	1.45	0.043
Arm	2	KKRKV	2.13	0.383
Arm	2	KK[KR][KR]	1.28	0.106
ASF1_hist_chap	2	RI.P	0.86	0.699
Asp	2	HPFH	0	1
Asp	2	PFH	1.79	0.308
Asp	2	HPFH.[LV]	0	1
Avidin	0	HPQ
Avidin	0	CHPQ
Avidin	0	C.{0,1}HPQ
Bac_export_2	0	S.[LV].V.N
Bac_export_2	0	KS.{1,2}I
Bac_export_2	0	TVI.KN
Bcl-2	0	I..LA..Y.Q
Bcl-2	0	LA..Y.Q.V
Bcl-2	0	A..YLQ.V
Bcl-2	2	QL..I[AG]D	0	1
Bcl-2	2	QL..I.D..N	0	1
Bcl-2	2	QL..I.D.[ILV]	0	1
BIR	0	AVP[FI]	8.87	0.107
BIR	0	A.P[FI]	2.54	0.062
BIR	0	AV.[FI]	1	0.563
BLUF	0	EQC..FL
BLUF	0	EQC..F..[DE]
BLUF	0	EQC[FL].F
Borealin	0	L.EFL	33.95	0
Borealin	0	L.EF	5.11	0.013
Borealin	0	EFL	4.56	0.019
BRCT	0	S..FP.A	1.2	0.501
BRCT	0	S..FP	1.19	0.216
BRCT	0	YD..Q.F.F	8.83	0.108
BRCT	1	SPTF	2.14	0.116
BRCT	1	SP.F	1.26	0.134
BRCT	1	S.{0,2}PTF	1.44	0.237
BRO1	0	K.L..W	2.23	0.104
Bromodomain	2	[GS].GG	1.36	0
Bromodomain	2	GKGG	3.41	0.002
Bromodomain	2	KG.{0,1}GK	2.59	0.001
CAP_GLY	2	DE.F	1.52	0.175
CAP_GLY	2	D.{0,1}E.F	0.95	0.613
Ca_channel_B	0	D..GY..W..Q
Ca_channel_B	0	Y..WITQ
Ca_channel_B	0	E..L..Y..W..Q
CBS	2	D.C.M..C..F
CBS	2	F.D.C.M..C
CBS	2	C.M..CK.F
Chromo	2	ARK[ST]	2.27	0.07
Chromo	2	A.{0,1}RK	1.37	0.008
Chromo	2	AR.{0,1}K	1.29	0.038
Collagen_bind	0	PP.PP..P
Collagen_bind	0	PP.P..PP
Collagen_bind	0	P..PP.PP
Corona_S2	0	I.R.N.V..N
Corona_S2	0	DR.N.V..N
Corona_S2	0	R.NE..KN
Corona_S2	1	N.Q..I.R.N
Corona_S2	1	N.Q..ID..N
Corona_S2	1	N.QK..D..N
Cpn60_TCP1	0	WGF.HP
Cpn60_TCP1	0	W.FLHP
Cpn60_TCP1	0	WGFLH
Cullin	0	WN.V..W.W	86.76	0
Cullin	0	W.W..V..NC	86.76	0.012
Cullin	0	WN..A.W.W	86.76	0
Cupin_2	0	[FV].[FL]..Q[HR][FW]
Cupin_2	0	[HR].[IL]L..VR
Cupin_2	0	[HR]..L.[AG]VR
Cyclin_N	0	K.{0,1}RRL	1.13	0.458	[RK].L.{0,1}[FYLIVMP] (LIG_CYCLIN_1)
Cyclin_N	0	K.{0,1}RRL.{0,1}F	6.6	0.036
Cyclin_N	0	R.[LV]F	0.94	0.675
DUF618	0	PSYSP	0	1
DUF618	0	YSPTS	0	1
DUF618	0	P.YSP	0	1
Dynein_light	0	K.TQT	6.2	0.15	[KR].TQT (LIG_Dynein_DLC8_1)
Dynein_light	0	K..QT	2.45	0.032
Dynein_light	0	K.TQ	0.44	0.907
E3_binding	0	AG..S..DY
E3_binding	0	G..SA.DY
E3_binding	0	AG..SA..Y
FHA	0	EVTE.D	25.86	0.039	T..[ILA] (LIG_FHA_1)
FHA	0	E.TEAD	12.93	0.076
FHA	0	EVT.AD	8.62	0.112
Fibrinogen_C	0	HRP	2.37	0.085
Fibrinogen_C	0	G.RP	1.52	0.196
Fibrinogen_C	0	GHRP	0	1
Filamin	0	[KR]S[AS]	1.2	0.066
Filamin	0	[ST]..[ST][ST]	1.17	0.021
fn1	0	SN..EFD	0	1
fn1	0	SN.V.FD	0	1
fn1	0	N..EFD.E	0	1
fn3	0	CHF.P..W	0	1
fn3	0	T..CH..P..W	0	1
fn3	0	CH..P.TW	0	1
Focal_AT	0	R.L.E	1.56	0.022	[LV][DE].[LM][LM]..L (LIG_PXL)
Focal_AT	0	RLL.E	2.23	0.103
Focal_AT	0	R.{0,1}L.{1,2}E	1.06	0.379
Focal_AT	1	R.L.E	1.56	0
Focal_AT	1	R.{0,1}L.{1,2}E	1.06	0.379
Gag_p24	1	ITF
GFO_IDH_MocA	0	C..SA
GFO_IDH_MocA_C	0	C..SA
Globin	2	[AS]..KF[FL]..V
Globin	2	P..H.S.D.F
Globin	2	P..H.S..KF
GP120	0	LG..G.CA
GP120	0	GL.G.CA
GP120	0	G.LG.CA
Gp_dh_N	0	YDNE.G
Gp_dh_N	0	YDNE..Y
Gp_dh_N	0	YDN..GY
GreA_GreB	1	Y.R.M.Q.E
GreA_GreB	1	YER.M.Q
GreA_GreB	1	GY.R.M.Q
Hemagglutinin	0	TLCLG
Hemagglutinin	0	TLC.G
Hemagglutinin	0	T.CLG
Histone	0	Q.RT.Y.F	0	1
Histone	0	QGR..Y.F	0	1
Histone	0	Q.R..YGF	0	1
Hormone_recep	2	[IL]L[HR].LL	0.7	0.806	L[^P]{2}[HI]I[^P]{2}[IAV][IL] (LIG_CORNRBOX), [^P](L)[^P][^P](L)(L)[^P] (LIG_NRBOX)
Hormone_recep	2	[IL]L..LL	0.87	0.872
Hormone_recep	2	HKI.HR	0	1
HSP70	0	RLLL
HSP70	0	R.LL
HSP70	0	RL.L
IF4E	0	YDR.FL	156.16	0
IF4E	0	YDR.F.[LM]	124.93	0
IF4E	0	Y.R.FL[LM]	124.93	0
IRS	0	[FI]..[KR].[FY]	1.48	0.003
Jacalin	0	IVG.WG
Jacalin	0	Q..IV..WG
Jacalin	0	Q..IVG.W
Jacalin	1	Q[ST].I
Jacalin	1	QSGI
Jacalin	1	QS.I
Jacalin	2	TVIVG
Jacalin	2	TVIV..W
Jacalin	2	T.IV..WG
Kinesin	2	E.EF.EA
Kinesin	2	M.{0,1}E.{0,2}F.EA
Kinesin	2	E.EF.E
Lactamase_B	0	M..K.[FL].[FL]..[AG]
Lactamase_B	0	KL[FY].[IL]..G
Lactamase_B	0	K.[FY][FV][IL]..G
Lectin_legB	0	[FW]YPY
Lectin_legB	0	[FM]Y.YPY
Lectin_legB	0	Y.YPY
Lectin_legB	1	Y.YPY
Lectin_legB	1	MYWY.Y
Lectin_legB	1	M.WYPY
Lectin_legB	2	YPY
Lectin_legB	2	Y.{0,2}PY
MAP1_LC3	0	D.WTH.S	108.44	0.009
MAP1_LC3	0	DDW.H.S	108.44	0.009
MAP1_LC3	0	DWTH.S	108.44	0.009
MATH	2	P.Q.T	0.84	0.884	[PSAT].[QE]E (LIG_TRAF2_1), P.Q..D (LIG_TRAF2_2)
MATH	2	P[IV]Q.T	1.38	0.203
MATH	2	P.{0,1}Q.{1,2}T	0.98	0.601
MBT	0	HRK..RD	56.58	0.018
MBT	0	HR.V.RD	169.74	0.006
MBT	0	HRKV..D	67.9	0.015
Med18	0	D.L.F	1.59	0.144
Med18	0	D.{1,2}L.F	1.02	0.54
MHC_I	1	GIGIL	9.53	0.101
MHC_I	1	A.{0,1}GIGI	0	1
MHC_I	1	A.{1,2}IGIL	0	1
MHC_I	2	A..N.ATM	0	1
MHC_I	2	A.YN.AT	0	1
MHC_I	2	A..NFAT	0	1
MHC_I	3	GI.I.TV	0	1
MHC_I	3	IGI.TV	0	1
MHC_I	3	GIGI.T	0	1
MHC_II_alpha	0	V.{0,1}HF.K..V	0	1
MHC_II_alpha	0	HF.K..V	0	1
MHC_II_alpha	0	HFF.N..T	0	1
MHC_II_beta	0	V.{0,1}HF.K..V	0	1
MHC_II_beta	0	HF.K..V	0	1
MHC_II_beta	0	HFF.N..T	0	1
Neur_chan_LBD	0	PRC.WR
Neur_chan_LBD	0	P.CAWR
Neur_chan_LBD	0	PRCAW
Neur_chan_LBD	1	PC.LNN
Neur_chan_LBD	1	P.{0,1}C.LNN
Neur_chan_LBD	1	PC..NN
NO_synthase	0	VKNWE
NO_synthase	0	KNWE
NO_synthase	0	VKNW
PAH	0	NIQM..E			[LIV]..[LM]L.AA.[FY][LI] (LIG_Sin3_1)
PAH	0	N.QM..E.A
PAH	0	N.QM..EA
PBP_dimer	0	Y..I..P.Q..M
PBP_dimer	0	Y.T..S..Q..M
PBP_dimer	0	Y..I.S..Q..M
PCNA_C	0	K.{0,2}QATL	34.22	0.029	(^.{0,3}|Q).[^FHWY][ILM][^P][^FHILVWYP][DHFM][FMY].. (LIG_PCNA)
PCNA_C	0	QATL	7.96	0.119
PCNA_C	0	K.{0,2}QAT	6.84	0.137
PCNA_C	1	K.TIY.K
PCNA_C	1	K.T.YIK
PCNA_C	1	K.TIYI
PCNA_N	0	RY..F..K..P
PCNA_N	0	K.Y..F..K..P
PCNA_N	0	Y..F..KD.P
PCNA_N	1	K.{0,2}QATL	34.22	0.029
PCNA_N	1	QATL	7.96	0.119
PCNA_N	1	K.{0,2}QAT	6.84	0.137
PDZ	0	RETQV	0	1	.[ST].[VIL]$ (LIG_PDZ_1), .[VYF].[VIL]$ (LIG_PDZ_2), .[DE].[IVL] (LIG_PDZ_3)
PDZ	0	R.{0,1}ETQV	0	1
PDZ	0	[KR]E[ST].V	1.39	0.049
Peptidase_A6	3	[FM]WE.V
Peptidase_A6	3	W.R..SI.K
Peptidase_A6	3	W.R..SI..S
Peptidase_C14	1	D.SD	1.36	0.028
Peptidase_C14	1	DE.D	2.18	0
Peptidase_C14	2	RT.Q..DI	10.94	0.089
Peptidase_C14	2	RT.Q..D.S	8.2	0.117
Peptidase_C14	2	R..Q..DIS	6.56	0.143
Peptidase_C14	4	DE.D	2.18	0
Peptidase_C14	4	DEV	1.7	0
Peptidase_C14	4	DEVD	4.1	0
Peptidase_C30	0	PS..VE.C
Peptidase_C30	0	PS..V..C.V
Peptidase_C30	0	S..VE.C.V
Peptidase_C30	1	S.{1,2}LQ
Peptidase_C30	1	[AS].LQ
Peptidase_M27	0	RRG
Peptidase_S29	1	K.S..I..RI
Peptidase_S29	1	S..I..RI..S
Peptidase_S29	1	K..V.I..RI
Peptidase_S8	0	PAPF	0	1
Peptidase_S8	0	P.PF	0.89	0.668
Peptidase_S8	0	PA.F	0.86	0.686
Peptidase_S9	0	GF.P	1.36	0.38
PHD	0	RTKQT	11.52	0.011
PHD	0	ART.QT	14.41	0.007
PHD	0	AR.KQT	14.41	0.007
Phospholip_A2_1	0	A.YS
Phospholip_A2_1	0	L.YK
Phospholip_A2_1	0	AI.S
Pico_P1A	1	SPC.LP
Pico_P1A	1	SPC..P
Pico_P1A	1	PC.LP
PID	2	Y.NP.YK	0	1
PID	2	Y.NPTY	0	1
PID	2	Y.N.TYK	0	1
Pkinase	3	RRRHP	1.02	0.675
Pkinase	3	KRR.HP	0	1
Pkinase	3	K.RRHP	1.36	0.57
Pkinase	5	WQ.E..ET
Pkinase	5	WQ.E..E
Pkinase	5	WQ..M..T..F
Pkinase	6	T.NL	1.14	0.024
Pkinase_Tyr	2	EIF..FE	0	1
Pkinase_Tyr	2	EIF.EF	0	1
Pkinase_Tyr	2	IF.EFE	0	1
Profilin	0	PPP.{0,1}PP	4.48	0
Profilin	0	PPP.{0,1}P.{0,1}P	3.46	0
Profilin	0	PP.{0,1}P.{0,1}PP	3.65	0
Proteasome	0	DHMVS	0	1
Proteasome	0	DHM.S	0	1
Proteasome	0	DHMV	0	1
Proteasome	1	D.SRFI
Proteasome	1	ED..RFI
Proteasome	1	E..SRFI
Proteasome_A_N	0	K.EDN.G	0	1
Proteasome_A_N	0	KE.DN.G	0	1
Proteasome_A_N	0	KEEDN	0	1
Pro_isomerase	0	A[AG]P	1.24	0.162
Pro_isomerase	0	A.P[FI]	1.44	0.031
Pro_isomerase	0	A.P.{0,1}A	1.17	0.232
PTS-HPr	0	QP.YDI
PTS-HPr	0	QP.Y.I..V
PTS-HPr	0	VQP.Y.I
RAG2	0	A.TKQT
RAG2	0	TKQTA
RAG2	0	A.T.QTA
Ras	4	Q..L..SE	1.22	0.369
Response_reg	2	LSQA
Response_reg	2	SQA
Response_reg	2	LSQ
RGS	0	WQ.E..ET
RGS	0	WQ.E..E
RGS	0	WQ..M..T..F
Ribosomal_S14	1	KR..L..KY
Ribosomal_S14	1	E..R..L..KY
Ribosomal_S14	1	R..KR..L..K
Ribosomal_S5_C	0	N..L..E.YS
Ribosomal_S5_C	0	NE.L..E.Y
Ribosomal_S5_C	0	NE..[IV].E.Y
RNA_pol_L	0	T.R..QF..R	32.47	0.031
RNA_pol_L	0	T.R..Q.E.R	16.23	0.061
RNA_pol_L	0	T..L.QF..R	32.47	0.031
RVP	0	R..NFL
RVP	0	N..QSRP
RVP	0	GN..Q.RP
SET	0	AR.{0,1}K.T	2.28	0.068
SET	0	[AS][KR]K	1.2	0.016
SET	0	[KR][KR]S	1.08	0.208
SH2	0	YVNV	3.85	0	Y.N. (LIG_SH2_GRB2), Y[IV].[VILP] (LIG_SH2_PTP2), Y[QDEVAIL][DENPYHI][IPVGAHS] (LIG_SH2_SRC), Y..Q (LIG_SH2_STAT3), Y[VLTFIC].. (LIG_SH2_STAT5)
SH2	0	Y[DE].[ILV]	1.09	0.037
SH2	0	YV.[MV]	0.94	0.718
SH2	1	S.TIYA	4.09	0.229
SH2	1	SLTIY	3.27	0.116
SH2	1	SLT.YA	4.09	0.229
SH3_1	0	P.{0,1}P.{0,2}P.{0,2}P	2.2	0	[RKY]..P..P (LIG_SH3_1), P..P.[KR] (LIG_SH3_2), ...[PV]..P (LIG_SH3_3)
SH3_1	0	P.{0,2}P.{0,1}P.{0,2}P	2.24	0
SH3_1	0	P.{0,2}P.{0,2}P.{0,2}P	2.11	0
SH3_1	1	P.{0,1}P..P	1.8	0
SH3_1	1	P.P..P	2.01	0
SH3_1	1	P.{0,1}P.{1,2}P	1.66	0
SH3_1	2	DR.TKP	1.72	0.468
SH3_1	2	DRST.P	2.74	0.157
SH3_1	2	DRS.KP	3.43	0.104
SIR2	0	HKKLM	0	1
SIR2	0	HKK.M	0	1
SIR2	0	HKK.MF	0	1
SLT_beta	0	THN.I.W
SLT_beta	0	THNK..W
SLT_beta	0	HN.I.WD
SspB	0	NDENY
SspB	0	A.ND.NY
SspB	0	A.N.ENY
SWIB	0	F.D.W..L	0	1	F...W..[LIV] (LIG_MDM2)
SWIB	0	F.D.W.{1,2}L	0	1
SWIB	0	F.D.WK..P	0	1
Toxin_1	2	RYY.SS
Toxin_1	2	RYYE.S
Toxin_1	2	RYYES
TPR_1	0	EEVD	2.01	0.027	EEVD$ (LIG_TPR)
TPR_1	0	MEEVD	7.59	0.026
TPR_1	0	MEE.D	2.21	0.105
TRF	0	[FY].L.P[LV]	2.67	0.172
TRF	0	FN..P..RR	81.33	0.012
TRF	0	[FY].L.P	1.38	0.238
Trypsin	1	PG.Y	1.87	0.001
Trypsin	1	AAP	0.87	0.852
Trypsin	1	PGAY	0	1
Trypsin	3	CGK	0.66	0.925
Trypsin	3	CGK.T	1.12	0.595
Trypsin	3	C.K.T	1.78	0.037
Trypsin	5	PAIQP	0	1
Trypsin	5	P.IQP	0	1
Trypsin	5	PA.QP	1.35	0.311
Trypsin	6	P.IQPV
Trypsin	6	P..QPV
Trypsin	6	P.IQP
Trypsin	7	CT..IPP	0	1
Trypsin	7	CT.S.PP	0	1
Trypsin	7	C..SIPP	0	1
Trypsin	8	P.IQPV
Trypsin	8	P.IQP.L
Trypsin	8	P..QPVL
Trypsin	11	CG.[KR]	1.24	0.189
Trypsin	11	KFQC.Q	0	1
Trypsin	11	FQCGQ	0	1
Trypsin	12	[FY]E.IP.E	0	1
Trypsin	12	[FY]E.IP	0	1
Trypsin	12	D[FY]E.IP	0	1
Tyr-DNA_phospho	0	KLNY	177.45	0.006
Tyr-DNA_phospho	0	K.NY	13.23	0.074
Tyr-DNA_phospho	0	LNY	9.83	0.099
UCR_14kD	0	RK..Y.PP	0	1
UCR_14kD	0	K..YRPP	0	1
UCR_14kD	0	K..K..Y.PP	0	1
V-set	1	C..RQ..N..T	0	1
V-set	1	C..RQ..N.T	0	1
V-set	1	IC..RQ..N	0	1
V-set	3	Q.DPAF	15.93	0.062
V-set	3	QLDP.F	0	1
V-set	3	QL.PAF	0	1
V-set	5	[IM][HR].G	1.18	0.115
V-set	6	NR..T..P..C	0	1
V-set	6	T..R..T..P..C	0	1
V-set	6	N.K.T..P..C	0	1
V-set	9	WF..T..LW	0	1
V-set	9	W..IT..LW	0	1
V-set	9	NWF.IT	0	1
V-set	10	E.DKW	5.31	0.053
V-set	10	E.DKWA	0	1
V-set	10	E.D.W	1.44	0.16
V-set	11	WF..T..LW	0	1
V-set	11	W..IT..LW	0	1
V-set	11	N.F..T..LW	0	1
V-set	14	GPGR.F
V-set	14	HIGP
V-set	14	GP.R.F
V-set	15	D.PDY.S	0	1
V-set	15	DVP.Y.S	0	1
V-set	15	VPDY.S	0	1
V-set	16	E.DKW	5.31	0.053
V-set	16	E.D.W	1.44	0.16
V-set	16	DKW	2.12	0.026
VHS	0	D..LL	1.12	0.314
VHS	0	D.{0,2}LL	1.04	0.404
VHS	0	DLLHI	21.22	0.046
WD40	0	RTKQT	6.71	0.006	F.[IV][^WFY][^WFY][IL][ILM] (LIG_EH1)
WD40	0	ART.QT	8.39	0.003
WD40	0	RT.QTA	5.59	0.012
WH1	0	FPPPP			FP.[PAILSK]P (LIG_EVH1_I), PP..F (LIG_EVH1_II)
WH1	0	PP.P
WH1	0	F.PPP
WW	0	P.{0,2}PP.{0,2}P	1.64	0	PP.Y (LIG_WW_1), PPLP (LIG_WW_2), ...[ST]P. (LIG_WW_4)
WW	0	P.{0,1}PP	1.37	0
WW	0	PPP	1.61	0
YkuD	0	T.P..TY.W
YkuD	0	R..V..P..T..W
YkuD	0	V..P..TY.W
Y_phosphatase	0	D.YL	1.25	0.101
Y_phosphatase	0	DE.L	0.96	0.652
